# Supplementary material for: MDCAN-Lys: A Model for Predicting Succinylation Sites Based on Multilane Dense Convolutional Attention Network
Source: MDPI journal article supplement (doi:10.3390/biom11060872), 2021-06-11
Supplement: s1 [file s1]

# MDCAN-Lys: A Model for Predicting Succinylation Sites Based on Multilane Dense Convolutional Attention Network

Huiqing Wang <sup>1</sup>, Hong Zhao <sup>\*</sup>, Zhiliang Yan, Jian Zhao, Jiale Han

College of Information and Computer, Taiyuan University of Technology,  
Taiyuan 030024, China; wanghuiqing@tyut.edu.cn (H.W.);  
zhaohong0383@link.tyut.edu.cn (H.Z.); yanzhiliang0342@link.tyut.edu.cn (Z.Y.);  
zhaojian0384@link.tyut.edu.cn (J.Z.); hanjiale0421@link.tyut.edu.cn (J.H.)  
<sup>\*</sup> Correspondence: zhaohong0383@link.tyut.edu.cn (H.Z.)

## Supplementary Tables

**Table S1.** The detailed values of 5 atchley factors for all the amino acids. ‘-’ means pseudo amino acid.

| Amino acid | FactorI | FactorII | FactorIII | FactorIV | FactorV |
|------------|---------|----------|-----------|----------|---------|
| A          | -0.591  | -1.302   | -0.733    | 1.570    | -0.146  |
| C          | -1.343  | 0.465    | -0.862    | -1.020   | -0.255  |
| D          | 1.050   | 0.302    | -3.656    | -0.259   | -3.242  |
| E          | 1.357   | -1.453   | 1.477     | 0.113    | -0.837  |
| F          | -1.006  | -0.590   | 1.891     | -0.397   | 0.412   |
| G          | -0.384  | 1.652    | 1.330     | 1.045    | 2.064   |
| H          | 0.336   | -0.417   | -1.673    | -1.474   | -0.078  |
| I          | -1.239  | -0.547   | 2.131     | 0.393    | 0.816   |
| K          | 1.831   | -0.561   | 0.533     | -0.277   | 1.648   |
| L          | -1.019  | -0.987   | -1.505    | 1.266    | -0.912  |
| M          | -0.663  | -1.524   | 2.219     | -1.005   | 1.212   |
| N          | 0.945   | 0.828    | 1.299     | -0.169   | 0.933   |
| P          | 0.189   | 2.081    | -1.628    | 0.421    | -1.392  |
| Q          | 0.931   | -0.179   | -3.005    | -0.503   | -1.853  |
| R          | 1.538   | -0.055   | 1.502     | 0.440    | 2.897   |
| S          | -0.228  | 1.399    | -4.760    | 0.670    | -2.647  |
| T          | -0.032  | 0.326    | 2.213     | 0.908    | 1.313   |
| V          | -1.337  | -0.279   | -0.544    | 1.242    | -1.262  |
| W          | -0.595  | 0.009    | 0.672     | -2.128   | -0.184  |
| Y          | 0.260   | 0.830    | 3.097     | -0.838   | 1.512   |
| -          | 0.000   | 0.000    | 0.000     | 0.000    | 0.000   |

**Table S2.** An example for the detailed values of structure information. P(C), P(E), and P(H) are secondary structures. Phi, Psi, Theta, and Tau are local backbone torsion angles. ASA means accessible surface area.

| #   | sequence | P(H)  | P(C)  | P(E)  | Phi     | Psi     | Theta   | Tau      | ASA     |
|-----|----------|-------|-------|-------|---------|---------|---------|----------|---------|
| 1   | M        | 0.000 | 1.000 | 0.000 | -91.666 | 130.708 | 113.914 | -146.738 | 135.508 |
| 2   | K        | 0.360 | 0.594 | 0.046 | -86.062 | 98.634  | 109.944 | -153.800 | 126.646 |
| 3   | G        | 0.495 | 0.417 | 0.089 | -67.886 | -28.976 | 104.914 | 51.980   | 34.582  |
| 4   | L        | 0.510 | 0.367 | 0.123 | -80.839 | -18.508 | 104.622 | 78.073   | 50.994  |
| 5   | T        | 0.518 | 0.354 | 0.129 | -82.939 | -13.558 | 106.243 | 81.074   | 44.509  |
| 6   | L        | 0.693 | 0.209 | 0.097 | -71.644 | -31.179 | 99.516  | 93.514   | 41.454  |
| 7   | N        | 0.675 | 0.234 | 0.091 | -73.767 | -28.184 | 99.682  | 58.869   | 85.859  |
| 8   | C        | 0.608 | 0.345 | 0.047 | -78.531 | -22.289 | 100.256 | 57.057   | 34.127  |
| 9   | L        | 0.364 | 0.596 | 0.040 | -81.739 | -13.829 | 101.870 | 61.127   | 49.580  |
| 10  | G        | 0.132 | 0.838 | 0.029 | 74.432  | 7.934   | 104.937 | -97.450  | 40.540  |
| ... | ...      | ...   | ...   | ...   | ...     | ...     | ...     | ...      | ...     |
| ... | ...      | ...   | ...   | ...   | ...     | ...     | ...     | ...      | ...     |
| ... | ...      | ...   | ...   | ...   | ...     | ...     | ...     | ...      | ...     |

**Table S3.** The 10-fold cross-validation performance with different numbers of dense convolutional blocks on the training set in Table1 (the data are percentages). The largest value for each indicator is highlighted in italic.

| Dense Blocks | Sn           | Sp           | Acc          | MCC   | Gmean        | AUC          | AUPR  |
|--------------|--------------|--------------|--------------|-------|--------------|--------------|-------|
| 2            | 63.66        | 77.15        | 76.02        | 25.72 | 70.05        | 78.87        | 24.16 |
| 3            | <i>66.81</i> | 76.75        | 75.91        | 27.36 | <i>71.37</i> | <i>80.35</i> | 25.88 |
| 4            | 60.29        | 79.16        | 77.58        | 25.65 | 68.81        | 79.22        | 23.88 |
| 5            | 57.95        | <i>80.55</i> | <i>78.66</i> | 25.54 | 68.11        | 79.07        | 23.67 |

**Table S4.** The 10-fold cross-validation performance with different model architectures (the data are percentages). The largest value for each indicator is highlighted in italic.

| Model                       | MCC   | Gmean        | AUC          | AUPR  |
|-----------------------------|-------|--------------|--------------|-------|
| only CNN                    | 11.39 | 57.70        | 64.38        | 13.87 |
| CNN + Multilane             | 22.45 | 58.82        | 76.86        | 23.10 |
| DenseCNN + Multilane        | 23.61 | 67.58        | 77.34        | 23.52 |
| DenseCNN + Multilane + CBAM | 27.35 | <i>71.37</i> | <i>80.35</i> | 25.88 |

**Table S5.** Details on the predictive results of human proteins for different methods on the independent test set. 'Total' means the total number of succinylated sites of a particular protein. Method <sup>a</sup> denotes iSuc-PseAAC. Method <sup>b</sup> denotes SuccinSite. Method <sup>c</sup> denotes pSuc-Lys. Method <sup>d</sup> denotes iSuc-PseOpt. Method <sup>e</sup> denotes HybridSucc. Method <sup>f</sup> denotes DeepSuccinylSite with one-hot encoding. Method <sup>g</sup> denotes DeepSuccinylSite with embedding encoding. Method <sup>h</sup> denotes MDCAN-Lys (our method).

| Protein | Total | Method <sup>a</sup> | Method <sup>b</sup> | Method <sup>c</sup> | Method <sup>d</sup> | Method <sup>e</sup> | Method <sup>f</sup> | Method <sup>g</sup> | Method <sup>h</sup> |
|---------|-------|---------------------|---------------------|---------------------|---------------------|---------------------|---------------------|---------------------|---------------------|
| P13667  | 4     | 0                   | 3                   | 1                   | 2                   | 4                   | 1                   | 2                   | 3                   |
| P13995  | 3     | 0                   | 1                   | 1                   | 1                   | 2                   | 1                   | 0                   | 2                   |
| O14929  | 1     | 0                   | 1                   | 0                   | 0                   | 1                   | 1                   | 0                   | 1                   |
| O15355  | 1     | 0                   | 1                   | 0                   | 0                   | 0                   | 0                   | 0                   | 1                   |
| O43175  | 2     | 0                   | 2                   | 1                   | 1                   | 2                   | 1                   | 0                   | 2                   |
| O43290  | 1     | 0                   | 1                   | 0                   | 1                   | 1                   | 1                   | 0                   | 0                   |
| O75521  | 2     | 1                   | 0                   | 0                   | 1                   | 0                   | 1                   | 0                   | 0                   |
| O76003  | 1     | 0                   | 1                   | 0                   | 0                   | 0                   | 1                   | 1                   | 0                   |
| O95139  | 2     | 0                   | 1                   | 0                   | 0                   | 1                   | 0                   | 0                   | 0                   |
| O95182  | 1     | 0                   | 0                   | 0                   | 0                   | 0                   | 1                   | 0                   | 0                   |
| P0DME0  | 2     | 0                   | 1                   | 0                   | 1                   | 1                   | 2                   | 1                   | 0                   |
| P16401  | 1     | 1                   | 1                   | 0                   | 0                   | 0                   | 1                   | 0                   | 1                   |
| P21964  | 1     | 0                   | 1                   | 0                   | 0                   | 0                   | 1                   | 1                   | 1                   |
| P27824  | 1     | 1                   | 1                   | 1                   | 1                   | 0                   | 1                   | 1                   | 1                   |
| P29966  | 1     | 0                   | 1                   | 0                   | 0                   | 0                   | 0                   | 1                   | 1                   |
| P30086  | 1     | 0                   | 1                   | 0                   | 0                   | 0                   | 0                   | 0                   | 0                   |
| P31943  | 2     | 0                   | 2                   | 0                   | 0                   | 1                   | 1                   | 1                   | 2                   |
| P36873  | 1     | 0                   | 1                   | 0                   | 1                   | 0                   | 1                   | 0                   | 1                   |
| P39748  | 2     | 0                   | 2                   | 0                   | 1                   | 0                   | 1                   | 1                   | 2                   |
| P41227  | 1     | 0                   | 1                   | 0                   | 0                   | 0                   | 1                   | 0                   | 1                   |
| P42126  | 2     | 0                   | 2                   | 1                   | 2                   | 0                   | 0                   | 0                   | 0                   |
| P49753  | 1     | 0                   | 1                   | 1                   | 1                   | 1                   | 1                   | 1                   | 1                   |
| P49755  | 2     | 1                   | 2                   | 0                   | 0                   | 0                   | 1                   | 1                   | 2                   |
| P62280  | 2     | 0                   | 1                   | 0                   | 0                   | 0                   | 0                   | 1                   | 2                   |
| Q10713  | 1     | 0                   | 1                   | 1                   | 1                   | 0                   | 0                   | 0                   | 1                   |
| Q13243  | 1     | 0                   | 1                   | 1                   | 1                   | 0                   | 1                   | 1                   | 1                   |
| Q13825  | 2     | 1                   | 2                   | 0                   | 0                   | 1                   | 1                   | 1                   | 2                   |
| Q5JRX3  | 2     | 0                   | 1                   | 2                   | 1                   | 0                   | 1                   | 1                   | 1                   |
| Q8WV44  | 1     | 0                   | 1                   | 1                   | 0                   | 0                   | 1                   | 1                   | 0                   |
| Q8WVY7  | 1     | 0                   | 1                   | 0                   | 0                   | 0                   | 1                   | 1                   | 1                   |
| Q92665  | 1     | 0                   | 1                   | 0                   | 0                   | 0                   | 1                   | 1                   | 1                   |
| Q9BQ69  | 2     | 0                   | 2                   | 1                   | 1                   | 0                   | 1                   | 1                   | 2                   |
| Q9BXJ9  | 2     | 0                   | 2                   | 0                   | 2                   | 1                   | 1                   | 0                   | 2                   |
| Q9UHD1  | 1     | 0                   | 1                   | 0                   | 1                   | 0                   | 0                   | 0                   | 1                   |
| P51659  | 7     | 0                   | 6                   | 2                   | 4                   | 2                   | 2                   | 2                   | 6                   |
| P42704  | 13    | 1                   | 7                   | 1                   | 4                   | 10                  | 8                   | 5                   | 8                   |

**Table S6.** Details on the predictive results of protein P23847 in the independent test set for different methods.

| Protein/<br>Methods           | Succinylation site/<br>Predicted succinylation sites | Total/<br>correctly predicted |
|-------------------------------|------------------------------------------------------|-------------------------------|
| P23847                        | 81、89、100、196、227、319、324、364、419、482、514、517、526    | 13                            |
| iSuc-PseAAC                   | 364、419、482                                          | 3                             |
| SuccinSite                    | 81、89、100、196、227、319、324、364、419、482、514、517、526    | 13                            |
| pSuc-Lys                      | 89、364、517                                           | 3                             |
| iSuc-PseOpt                   | 89、324、364、517、526                                   | 5                             |
| HybridSucc                    | 319、517                                              | 2                             |
| DeepSuccinylSite <sup>a</sup> | 100、196、324、419、482、514、526                          | 7                             |
| DeepSuccinylSite <sup>b</sup> | 100、482、514                                          | 3                             |
| Our Method                    | 89、196、227、319、324、364、419、517                       | 8                             |

## Supplementary Figures

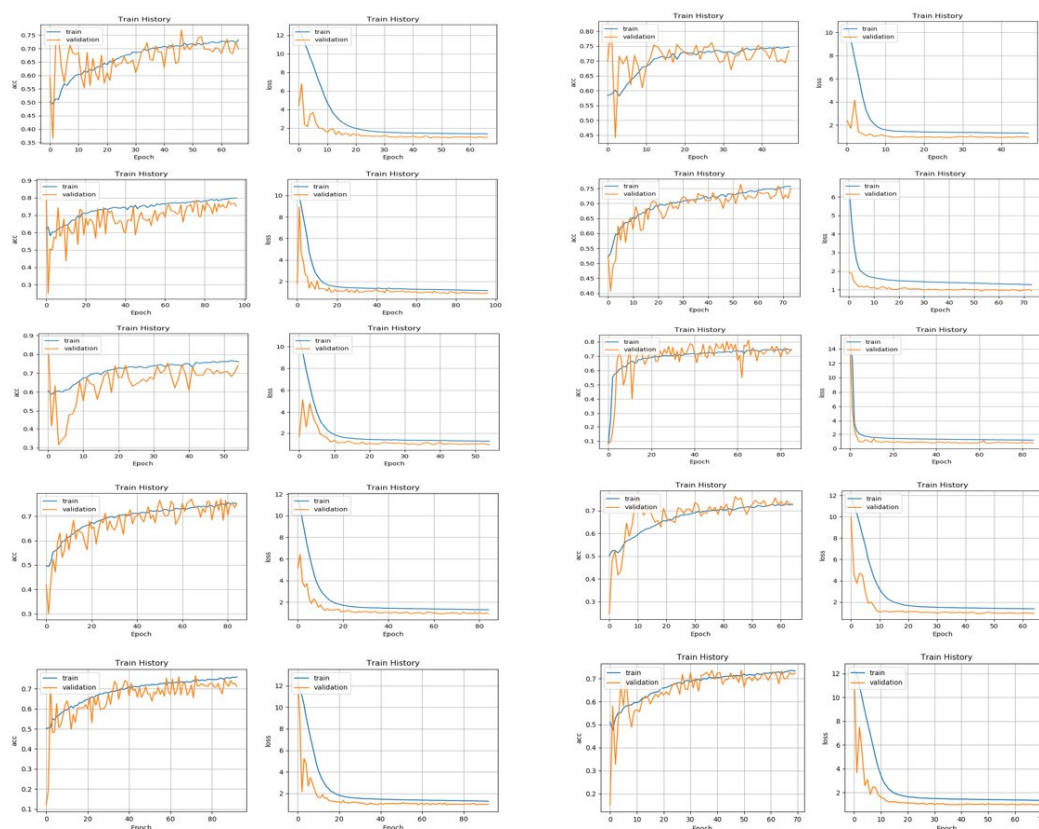

**Figure S1.** The training/validation loss/accuracy curve of the proposed model MDCAN-Lys by 10-fold cross-validation with window size = 33 on the training set described in Table 1. The blue line is training and the orange line is validation.
